# Supplementary material for: Differential Cell Lysis Among Periodontal Strains of JP2 and Non-JP2 Genotype of Aggregatibacter actinomycetemcomitans Serotype B Is Not Reflected in Dissimilar Expression and Production of Leukotoxin
Source: MDPI journal article supplement (doi:10.3390/pathogens8040211), 2019-10-30
Supplement: s1 [file s1]

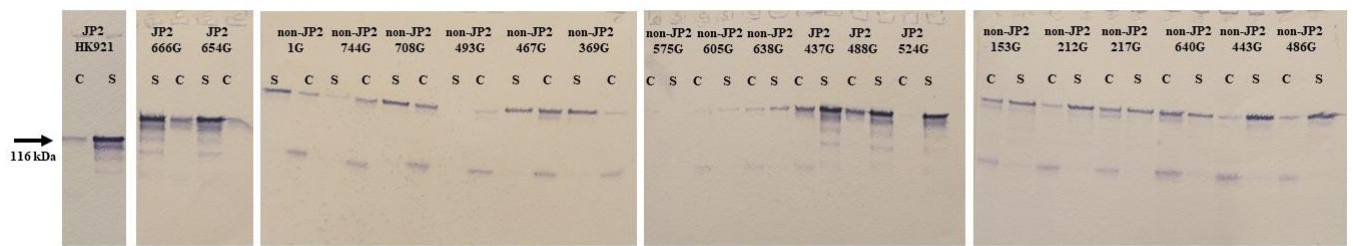

**Figure 1.** Western blotting of the twenty Ghanaian *A. actinomycetemcomitans*, serotype b, JP2 and non-JP2 genotypes showing a semi-quantitative determination of the leukotoxic production of the strains. The cell membrane-attached LtxA isolated from the cell pellet (C), and the released LtxA into the growth supernatant (S). HK921 (JP2) is illustrated as a reference. The LtxA is given as the band with a size of 116 kDa.
